# Supplementary material for: Supramolecular assemblies of organotin(iv)–diphosphoryl adducts: insights from X-rays and DFT
Source: Royal Society of Chemistry journal article supplement (doi:10.1039/c5ra15645a), 2015-01-01
Supplement: c5ra15645a1.pdf [file c5ra15645a1.pdf]

**Table S1.** Crystallographic data for compounds **L**, **C<sub>1</sub>**, **C<sub>2</sub>** and **C<sub>3</sub>**.

**Crystal data**

| <b>L</b>                                                      | <b>C<sub>1</sub></b>                                                                      | <b>C<sub>2</sub></b>                                                                      | <b>C<sub>3</sub></b>                                                                      |
|---------------------------------------------------------------|-------------------------------------------------------------------------------------------|-------------------------------------------------------------------------------------------|-------------------------------------------------------------------------------------------|
| <u>C<sub>30</sub>H<sub>24</sub>O<sub>4</sub>P<sub>2</sub></u> | <u>C<sub>42</sub>H<sub>34</sub>Cl<sub>6</sub>O<sub>4</sub>P<sub>2</sub>Sn<sub>2</sub></u> | <u>C<sub>54</sub>H<sub>44</sub>Cl<sub>4</sub>O<sub>4</sub>P<sub>2</sub>Sn<sub>2</sub></u> | <u>C<sub>66</sub>H<sub>54</sub>Cl<sub>2</sub>O<sub>4</sub>P<sub>2</sub>Sn<sub>2</sub></u> |
| $M_r = 510.43$                                                | $M_r = 1114.75$                                                                           | $M_r = 1198.01$                                                                           | $M_r = 1281.31$                                                                           |
| <u>Triclinic, <i>P</i> -1</u>                                 | <u>Triclinic, <i>P</i> -1</u>                                                             | <u>Triclinic, <i>P</i> -1</u>                                                             | <u>Triclinic, <i>P</i> -1</u>                                                             |
| Hall symbol: <u>-P 1</u>                                      | Hall symbol: <u>-P 1</u>                                                                  | Hall symbol: <u>-P 1</u>                                                                  | Hall symbol: <u>-P 1</u>                                                                  |
| $a = 7.3668$ (8) Å                                            | $a = 9.0016$ (12) Å                                                                       | $a = 9.1485$ (5) Å                                                                        | $a = 9.1301$ (3) Å                                                                        |
| $b = 8.7106$ (9) Å                                            | $b = 9.2252$ (12) Å                                                                       | $b = 10.3271$ (6) Å                                                                       | $b = 11.5145$ (3) Å                                                                       |
| $c = 9.7905$ (10) Å                                           | $c = 14.687$ (2) Å                                                                        | $c = 13.8774$ (8) Å                                                                       | $c = 14.8677$ (4) Å                                                                       |
| $\alpha = 91.328$ (2)°                                        | $\alpha = 78.123$ (10)°                                                                   | $\alpha = 84.115$ (4)°                                                                    | $\alpha = 85.9720$ (10)°                                                                  |
| $\beta = 92.013$ (2)°                                         | $\beta = 87.443$ (11)°                                                                    | $\beta = 82.537$ (4)°                                                                     | $\beta = 81.8120$ (10)°                                                                   |
| $\gamma = 96.6198$ (19)°                                      | $\gamma = 67.904$ (10)°                                                                   | $\gamma = 81.294$ (4)°                                                                    | $\gamma = 69.8930$ (10)°                                                                  |
| $V = 623.44$ (11) Å <sup>3</sup>                              | $V = 1105.1$ (3) Å <sup>3</sup>                                                           | $V = 1280.42$ (13) Å <sup>3</sup>                                                         | $V = 1452.41$ (7) Å <sup>3</sup>                                                          |
| $Z = 1$                                                       | $Z = 1$                                                                                   | $Z = 1$                                                                                   | $Z = 1$                                                                                   |
| $F_{000} = 266$                                               | $F_{000} = 550$                                                                           | $F_{000} = 598$                                                                           | $F_{000} = 646$                                                                           |
| $D_x = 1.360$ Mg m <sup>-3</sup>                              | $D_x = 1.675$ Mg m <sup>-3</sup>                                                          | $D_x = 1.554$ Mg m <sup>-3</sup>                                                          | $D_x = 1.465$ Mg m <sup>-3</sup>                                                          |
| Melting point: <u>480</u> K                                   | Melting point: <u>470</u> K                                                               | Melting point: <u>465</u> K                                                               | Melting point: <u>445</u> K                                                               |
| <u>Mo <i>K</i>α radiation</u><br>$\lambda = 0.71073$ Å        | <u>Mo <i>K</i>α radiation</u><br>$\lambda = 0.71073$ Å                                    | <u>Mo <i>K</i>α radiation</u><br>$\lambda = 0.71073$ Å                                    | <u>Mo <i>K</i>α radiation</u><br>$\lambda = 0.71073$ Å                                    |
| Cell parameters from <u>2439</u> reflections                  | Cell parameters from <u>39486</u> reflections                                             | Cell parameters from <u>16302</u> reflections                                             | Cell parameters from <u>9852</u> reflections                                              |
| $\theta = 2.4$ – <u>30.0</u> °                                | $\theta = 1.4$ – <u>29.6</u> °                                                            | $\theta = 2.0$ – <u>29.6</u> °                                                            | $\theta = 2.4$ – <u>32.7</u> °                                                            |
| $\mu = 0.21$ mm <sup>-1</sup>                                 | $\mu = 1.61$ mm <sup>-1</sup>                                                             | $\mu = 1.29$ mm <sup>-1</sup>                                                             | $\mu = 1.06$ mm <sup>-1</sup>                                                             |
| $T = 100.0$ K                                                 | $T = 292$ (2) K                                                                           | $T = 292$ (2) K                                                                           | $T = 100$ (2) K                                                                           |
| <u>Prism, colourless</u>                                      | <u>Platelet, colourless</u>                                                               | <u>Prism, colourless</u>                                                                  | <u>Prism, colourless</u>                                                                  |
| <u>0.21 × 0.19 × 0.17</u> mm                                  | <u>0.50 × 0.33 × 0.10</u> mm                                                              | <u>0.47 × 0.17 × 0.08</u> mm                                                              | <u>0.24 × 0.18 × 0.15</u> mm                                                              |

**Data collection**

| <b>L</b>                        | <b>C<sub>1</sub></b> | <b>C<sub>2</sub></b> | <b>C<sub>3</sub></b>      |
|---------------------------------|----------------------|----------------------|---------------------------|
| <u>Bruker SMART APEX II CCD</u> | <u>STOE IPDS 2</u>   | <u>STOE IPDS 2</u>   | <u>Bruker APEX-II CCD</u> |

|                                                                                                                                                                                                                                                                                |                                                                         |                                                                         |                                                                   |
|--------------------------------------------------------------------------------------------------------------------------------------------------------------------------------------------------------------------------------------------------------------------------------|-------------------------------------------------------------------------|-------------------------------------------------------------------------|-------------------------------------------------------------------|
| <u>area detector diffractometer</u>                                                                                                                                                                                                                                            | <u>diffractometer</u>                                                   | <u>diffractometer</u>                                                   | <u>diffractometer</u>                                             |
| Monochromator: <u>graphite</u>                                                                                                                                                                                                                                                 | Monochromator: <u>plane graphite</u>                                    | Monochromator: <u>plane graphite</u>                                    | Monochromator: <u>graphite</u>                                    |
| Detector resolution: <u>8 pixels mm<sup>-1</sup></u>                                                                                                                                                                                                                           | Detector resolution: <u>6.67 pixels mm<sup>-1</sup></u>                 | Detector resolution: <u>6.67 pixels mm<sup>-1</sup></u>                 | Detector resolution: <u>? pixels mm<sup>-1</sup></u>              |
| $T = $ <u>100.0 K</u>                                                                                                                                                                                                                                                          | $T = $ <u>292 K</u>                                                     | $T = $ <u>292 K</u>                                                     | $T = $ <u>100(2) K</u>                                            |
| <u><math>\omega</math> and <math>\phi</math> scans</u>                                                                                                                                                                                                                         | <u>rotation method scans</u>                                            | <u>rotation method scans</u>                                            | <u><math>\phi</math> and <math>\omega</math> scans</u>            |
| Absorption correction: <u>multi-scan SADABS-2008/1 (Bruker,2008) was used for absorption correction. R(int) was 0.0605 before and 0.0500 after correction. The Ratio of minimum to maximum transmission is 0.8846. The <math>\lambda/2</math> correction factor is 0.0015.</u> | Absorption correction: <u>integration Stoe XRed32 1.31, Stoe (2005)</u> | Absorption correction: <u>integration Stoe XRed32 1.31, Stoe (2005)</u> | Absorption correction: <u>multi-scan SADABS (Sheldrick, 2003)</u> |
| $T_{\min} = $ <u>0.763</u> , $T_{\max} = $ <u>0.862</u>                                                                                                                                                                                                                        | $T_{\min} = $ <u>0.509</u> , $T_{\max} = $ <u>0.840</u>                 | $T_{\min} = $ <u>0.6394</u> , $T_{\max} = $ <u>0.9157</u>               | $T_{\min} = $ <u>0.786</u> , $T_{\max} = $ <u>0.858</u>           |
| <u>8072</u> measured reflections                                                                                                                                                                                                                                               | <u>20691</u> measured reflections                                       | <u>12460</u> measured reflections                                       | <u>19148</u> measured reflections                                 |
| <u>3670</u> independent reflections                                                                                                                                                                                                                                            | <u>5948</u> independent reflections                                     | <u>6350</u> independent reflections                                     | <u>8447</u> independent reflections                               |
| <u>2930</u> reflections with $I > 2\sigma(I)$                                                                                                                                                                                                                                  | <u>5340</u> reflections with $I > 2\sigma(I)$                           | <u>5603</u> reflections with $I > 2\sigma(I)$                           | <u>7960</u> reflections with $I > 2\sigma(I)$                     |
| $R_{\text{int}} = $ <u>0.045</u>                                                                                                                                                                                                                                               | $R_{\text{int}} = $ <u>0.029</u>                                        | $R_{\text{int}} = $ <u>0.041</u>                                        | $R_{\text{int}} = $ <u>0.014</u>                                  |
| $\theta_{\text{max}} = $ <u>30.2°</u>                                                                                                                                                                                                                                          | $\theta_{\text{max}} = $ <u>29.6°</u>                                   | $\theta_{\text{max}} = $ <u>29.1°</u>                                   | $\theta_{\text{max}} = $ <u>30.0°</u>                             |
| $\theta_{\text{min}} = $ <u>2.1°</u>                                                                                                                                                                                                                                           | $\theta_{\text{min}} = $ <u>2.4°</u>                                    | $\theta_{\text{min}} = $ <u>2.0°</u>                                    | $\theta_{\text{min}} = $ <u>1.9°</u>                              |
| $h = $ <u>-10→10</u>                                                                                                                                                                                                                                                           | $h = $ <u>-12→11</u>                                                    | $h = $ <u>-12→12</u>                                                    | $h = $ <u>-12→12</u>                                              |
| $k = $ <u>-12→12</u>                                                                                                                                                                                                                                                           | $k = $ <u>-11→12</u>                                                    | $k = $ <u>-14→13</u>                                                    | $k = $ <u>-16→16</u>                                              |
| $l = $ <u>-13→13</u>                                                                                                                                                                                                                                                           | $l = $ <u>-20→20</u>                                                    | $l = $ <u>-18→18</u>                                                    | $l = $ <u>-20→20</u>                                              |

### Refinement

| <b>L</b>                          | <b>C<sub>1</sub></b>              | <b>C<sub>2</sub></b>              | <b>C<sub>3</sub></b>              |
|-----------------------------------|-----------------------------------|-----------------------------------|-----------------------------------|
| Refinement on $F^2$               | Refinement on $F^2$               | Refinement on $F^2$               | Refinement on $F^2$               |
| Least-squares matrix: <u>full</u> | Least-squares matrix: <u>full</u> | Least-squares matrix: <u>full</u> | Least-squares matrix: <u>full</u> |

|                                                                                     |                                                                                                                                                |                                                                           |                                                                                   |
|-------------------------------------------------------------------------------------|------------------------------------------------------------------------------------------------------------------------------------------------|---------------------------------------------------------------------------|-----------------------------------------------------------------------------------|
| $R[F^2 > 2\sigma(F^2)] = \underline{0.047}$                                         | $R[F^2 > 2\sigma(F^2)] = \underline{0.023}$                                                                                                    | $R[F^2 > 2\sigma(F^2)] = \underline{0.025}$                               | $R[F^2 > 2\sigma(F^2)] = \underline{0.018}$                                       |
| $wR(F^2) = \underline{0.108}$                                                       | $wR(F^2) = \underline{0.069}$                                                                                                                  | $wR(F^2) = \underline{0.057}$                                             | $wR(F^2) = \underline{0.047}$                                                     |
| $S = \underline{1.03}$                                                              | $S = \underline{1.15}$                                                                                                                         | $S = \underline{1.06}$                                                    | $S = \underline{1.00}$                                                            |
| <u>3670 reflections</u>                                                             | <u>5948 reflections</u>                                                                                                                        | <u>6350 reflections</u>                                                   | <u>8447 reflections</u>                                                           |
| <u>163 parameters</u>                                                               | <u>254 parameters</u>                                                                                                                          | <u>298 parameters</u>                                                     | <u>343 parameters</u>                                                             |
| Primary atom site location: <u>structure-invariant direct methods</u>               | Primary atom site location: ?                                                                                                                  | Primary atom site location: ?                                             | Primary atom site location: <u>structure-invariant direct methods</u>             |
| Hydrogen site location: <u>inferred from neighbouring sites</u>                     | Hydrogen site location: <u>inferred from neighbouring sites</u>                                                                                | Hydrogen site location: <u>inferred from neighbouring sites</u>           | Hydrogen site location: <u>inferred from neighbouring sites</u>                   |
| <u>H-atom parameters constrained</u>                                                | <u>H-atom parameters constrained</u>                                                                                                           | <u>H-atom parameters constrained</u>                                      | <u>H-atom parameters constrained</u>                                              |
| $w = 1/[\sigma^2(F_o^2) + (0.0384P)^2 + 0.2322P]$<br>where $P = (F_o^2 + 2F_c^2)/3$ | $w = 1/[\sigma^2(F_o^2) + (0.0391P)^2 + 0.1785P]$<br>where $P = (F_o^2 + 2F_c^2)/3$                                                            | $w = 1/[\sigma^2(F_o^2) + (0.0341P)^2]$<br>where $P = (F_o^2 + 2F_c^2)/3$ | $w = 1/[\sigma^2(F_o^2) + (0.0226P)^2 + 0.76P]$<br>where $P = (F_o^2 + 2F_c^2)/3$ |
| $(\Delta/\sigma)_{\max} \leq \underline{0.001}$                                     | $(\Delta/\sigma)_{\max} = \underline{0.001}$                                                                                                   | $(\Delta/\sigma)_{\max} = \underline{0.004}$                              | $(\Delta/\sigma)_{\max} = \underline{0.001}$                                      |
| $\Delta\rho_{\max} = \underline{0.47} \text{ e } \text{\AA}^{-3}$                   | $\Delta\rho_{\max} = \underline{0.49} \text{ e } \text{\AA}^{-3}$                                                                              | $\Delta\rho_{\max} = \underline{1.22} \text{ e } \text{\AA}^{-3}$         | $\Delta\rho_{\max} = \underline{0.54} \text{ e } \text{\AA}^{-3}$                 |
| $\Delta\rho_{\min} = \underline{-0.47} \text{ e } \text{\AA}^{-3}$                  | $\Delta\rho_{\min} = \underline{-0.50} \text{ e } \text{\AA}^{-3}$                                                                             | $\Delta\rho_{\min} = \underline{-0.66} \text{ e } \text{\AA}^{-3}$        | $\Delta\rho_{\min} = \underline{-0.54} \text{ e } \text{\AA}^{-3}$                |
| Extinction correction: <u>none</u>                                                  | Extinction correction: <u>SHELXL-2014/7 (Sheldrick 2014, <math>F_c^* = kFc[1 + 0.001 \times Fc^2 \lambda^3 / \sin(2\theta)]^{-1/4}</math>)</u> | Extinction correction: <u>none</u>                                        | Extinction correction: <u>none</u>                                                |
